# Supplementary material for: Genetic Diversity, Host Adaptation, and Public Health Implications of Escherichia coli in Qinghai Plateau Animals
Source: Research Square preprint supplement (doi:10.21203/rs.3.rs-6997435/v1), 2025-08-12
Supplement: Supplementary file 1 [file 57eb343558ea0ffa3268bce2.xlsx]

## Sheet: 1
No.	Strain	Isolation Site	Isolation source	phylogroup
1	QML2206-1	Qumalai	Yak	B1
2	QML2206-2	Qumalai	Yak	B1
3	QML2206-4	Qumalai	Yak	B1
4	QML2206-5	Qumalai	Yak	B1
5	QML2206-6	Qumalai	Yak	B1
6	QML2206-7	Qumalai	Yak	B1
7	QML2206-8	Qumalai	Yak	B1
8	QML2206-9	Qumalai	Yak	B1
9	QML2206-10	Qumalai	Yak	B1
10	QML2206-12	Qumalai	Yak	B1
11	QML2206-13	Qumalai	Yak	A
12	QML2206-14	Qumalai	Yak	A
13	QML2206-15	Qumalai	Yak	B1
14	YS2206-1	Yushu	Yak	A
15	YS2206-2	Yushu	Yak	B2
16	YS2206-3	Yushu	Yak	B1
17	YS2206-4	Yushu	Yak	B1
18	YS2206-5	Yushu	Yak	B1
19	YS2206-6	Yushu	Yak	B1
20	YS2206-7	Yushu	Yak	B1
21	YS2206-9	Yushu	Yak	B1
22	YS2206-11	Yushu	Yak	B1
23	ZD2206-10	Zhiduo	Yak	B1
24	YS2206-8	Yushu	Yak	B1
25	MQ2206-1	Maqin	Yak	B1
26	MQ2206-3	Maqin	Yak	A
27	MQ2206-4	Maqin	Yak	A
28	MQ2206-6	Maqin	Yak	B1
29	MQ2206-7	Maqin	Yak	B1
30	XMCS2207-1	Maqin	Yak	B1
31	XMCS2207-2	Maqin	Yak	A
32	XMCS2207-3S	Maqin	Yak	A
33	XMCS2207-4	Maqin	Yak	B1
34	XMCS2207-5	Maqin	Yak	B1
35	XMCS2207-6	Maqin	Yak	B1
36	XMCH2207-7	Maqin	Yak	B1
37	XMC2207-1	Maqin	Yak	B1
38	XMC2207-1C	Maqin	Yak	B1
39	XMC2207-3	Maqin	Yak	B1
40	XMC2207-4	Maqin	Yak	A
41	XMC2207-5	Maqin	Yak	B1
42	XMC2207-7	Maqin	Yak	B1
43	XMC2207-8	Maqin	Yak	B1
44	XMC2207-9A	Maqin	Yak	B1
45	XMC2207-10	Maqin	Yak	B1
46	MQ2206-21	Maqin	Yak	B1
47	MQ2206-21A	Maqin	Yak	A
48	MQ2206-22	Maqin	Yak	B1
49	MQ2206-23	Maqin	Yak	B1
50	MQ2206-25	Maqin	Yak	B1
51	MQ2206-26	Maqin	Yak	B1
52	MQ2206-27	Maqin	Yak	B1
53	MQ2206-30	Maqin	Yak	B1
54	MQ2206-31	Maqin	Yak	B1
55	MQ2206-33	Maqin	Yak	B1
56	MQ2206-34	Maqin	Yak	B1
57	MQ2206-35	Maqin	Yak	B1
58	MQ2206-37	Maqin	Yak	B1
59	MQ2206-38	Maqin	Yak	B1
60	MQ2206-39	Maqin	Yak	B1
61	MQ2206-40	Maqin	Yak	B1
62	MQ2206-41	Maqin	Yak	B1
63	MQ2206-42	Maqin	Yak	B1
64	MQ-1	Maqin	Yak	B1
65	MQ-2	Maqin	Yak	B1
66	XMCS2207-3A	Maqin	Yak	A
67	XMCS2207-3B	Maqin	Yak	A
68	XMC2207-9S	Maqin	Yak	B1
69	XMC2207-9B	Maqin	Yak	B1
70	HY2206-1	Haiyan	Yak	B1
71	HY2206-5	Haiyan	Yak	B1
72	HY2206-9	Haiyan	Yak	B1
73	HY2206-10	Haiyan	Yak	B1
74	HY2206-1x	Haiyan	Yak	B1
75	HY2206-6x	Haiyan	Yak	A
76	HY2206-8x	Haiyan	Yak	B1
77	HY2206-9x	Haiyan	Yak	B1
78	HY2206-10x	Haiyan	Yak	A
79	HY2206-11x	Haiyan	Yak	B1
80	YS2305-1	Yushu	Yak	B2
81	YS2305-2	Yushu	Yak	B2
82	YS2305-3	Yushu	Yak	B2
83	MQ1-1	Maqin	Yak	B1
84	MQ2-1	Maqin	Yak	B1
85	MQ3-1	Maqin	Yak	B1
86	MQ4-1	Maqin	Yak	B1
87	MQ5-1	Maqin	Yak	B1
88	MQ6-1	Maqin	Yak	B1
89	WA01	Yushu	Wild animal	B2
90	WA02	Maduo	Wild animal	B1
91	WA03	Maduo	Wild animal	A
92	WA04	Maduo	Wild animal	A
93	WA05	Maduo	Wild animal	B1
94	WA06	Maduo	Wild animal	B1
95	WA07	Yushu	Wild animal	B1
96	WA08	Maduo	Wild animal	B1
97	WA09	Maduo	Wild animal	B1
98	WA10	Maduo	Wild animal	B1
99	WA11	Maduo	Wild animal	A
100	WA12	Maduo	Wild animal	A
101	WA13	Maduo	Wild animal	B1
102	WA14	Maduo	Wild animal	B1
103	WA15	Maduo	Wild animal	B1
104	WA16	Maduo	Wild animal	B1
105	WA17	Maduo	Wild animal	B1
106	WA18	Maduo	Wild animal	B1
107	WA19	Maduo	Wild animal	B1
108	WA20	Maduo	Wild animal	B1
109	WA21	Yushu	Wild animal	B1
110	WA22	Yushu	Wild animal	B1
111	WA23	Maduo	Wild animal	B1
112	WA24	Maduo	Wild animal	B1
113	WA25	Maduo	Wild animal	B1
114	WA26	Maduo	Wild animal	B1
115	WA27	Maduo	Wild animal	B1
116	WA28	Yushu	Wild animal	A
117	WA29	Maduo	Wild animal	B1
118	WA30	Maduo	Wild animal	A
119	WA31	Maduo	Wild animal	A
120	WA32	Maduo	Wild animal	B2
121	WA33	Maduo	Wild animal	A
122	WA34	Maduo	Wild animal	B1
123	WA35	Maduo	Wild animal	B1
124	WA36	Maduo	Wild animal	B2
