# Supplementary material for: Genetic Diversity, Host Adaptation, and Public Health Implications of Escherichia coli in Qinghai Plateau Animals
Source: Research Square preprint supplement (doi:10.21203/rs.3.rs-6997435/v1), 2025-08-12
Supplement: Supplementary file 2 [file 5d8842271008501c8a668258.xlsx]

## Sheet: 3
No.	Strain	TCY	CIP	OFX	KAN	CRO	CTX	AMK	GEN	AMP	NOR	SXT
1	HY2206-1	S	S	S	S	S	R	S	S	I	S	S
2	HY2206-10	S	S	S	R	S	I	R	R	S	S	S
3	HY2206-10x	S	S	S	S	S	S	S	S	S	S	S
4	HY2206-11x	S	S	S	I	S	S	S	S	S	S	S
5	HY2206-1x	S	S	S	R	S	R	R	S	I	S	S
6	HY2206-5	S	I	S	I	S	S	S	S	R	S	S
7	HY2206-6x	S	R	S	S	R	R	R	I	S	I	S
8	HY2206-8x	S	I	I	I	I	R	S	S	R	S	S
9	HY2206-9	S	S	I	S	I	R	S	S	R	S	S
10	HY2206-9x	S	S	S	R	S	I	I	R	I	S	S
11	MQ-1	R	S	S	I	S	S	S	S	I	S	S
12	MQ1-1	S	S	S	I	S	R	S	S	R	S	R
13	MQ-2	R	S	S	I	S	S	S	S	S	S	S
14	MQ2-1	S	S	S	I	S	R	S	S	R	S	S
15	MQ2206-1	R	S	S	S	S	S	S	S	S	R	S
16	MQ2206-21	S	S	S	I	S	R	I	S	I	S	S
17	MQ2206-21A	S	S	S	I	S	S	S	S	S	S	S
18	MQ2206-22	R	S	S	I	S	S	I	S	S	S	S
19	MQ2206-23	R	S	S	S	S	S	S	S	S	S	S
20	MQ2206-25	R	S	S	R	S	S	S	R	R	S	S
21	MQ2206-26	R	R	S	R	R	R	S	R	R	S	R
22	MQ2206-27	S	S	S	S	S	S	S	S	S	S	S
23	MQ2206-3	R	S	S	I	S	I	S	S	S	S	R
24	MQ2206-30	R	R	R	S	S	S	I	R	S	S	S
25	MQ2206-31	R	R	S	I	S	S	R	R	I	S	R
26	MQ2206-33	S	S	S	S	S	S	S	S	S	S	S
27	MQ2206-34	R	S	S	S	S	S	S	S	R	S	S
28	MQ2206-35	S	R	R	R	I	R	S	R	I	S	S
29	MQ2206-37	S	S	S	I	S	I	S	S	I	S	S
30	MQ2206-38	R	R	S	I	S	R	S	S	S	S	S
31	MQ2206-39	S	I	S	I	S	R	S	S	R	S	S
32	MQ2206-4	S	S	S	I	I	I	S	S	S	S	S
33	MQ2206-40	S	S	S	I	S	R	S	S	R	S	S
34	MQ2206-41	R	S	S	S	S	I	R	S	S	S	S
35	MQ2206-42	R	S	S	S	S	I	I	S	R	S	S
36	MQ2206-6	S	S	S	S	S	I	S	R	R	R	S
37	MQ2206-7	I	S	S	I	S	S	I	S	I	S	S
38	MQ3-1	R	R	R	S	S	R	S	S	R	R	R
39	MQ4-1	S	I	S	R	R	R	S	R	R	S	S
40	MQ5-1	R	R	R	I	R	R	S	S	R	R	R
41	MQ6-1	S	S	S	S	S	R	S	S	R	S	R
42	QML2206-1	S	R	S	I	I	S	I	S	S	S	S
43	QML2206-10	S	S	S	S	S	I	S	S	S	S	S
44	QML2206-12	S	S	S	R	S	R	S	S	S	S	S
45	QML2206-13	I	S	S	I	S	I	S	I	S	S	S
46	QML2206-14	R	R	R	S	R	R	S	S	R	R	R
47	QML2206-15	R	R	R	I	R	R	S	S	R	R	R
48	QML2206-2	S	R	S	R	S	I	S	R	S	S	R
49	QML2206-4	S	S	S	I	S	I	I	I	I	S	S
50	QML2206-5	S	I	S	I	I	I	S	S	S	S	S
51	QML2206-6	S	S	S	I	S	R	S	S	S	S	S
52	QML2206-7	I	R	S	S	R	R	S	S	R	S	S
53	QML2206-8	R	R	R	I	S	R	S	S	R	R	R
54	QML2206-9	R	S	S	I	S	S	S	S	I	S	S
55	XMC2207-1	S	R	S	S	S	S	S	I	S	S	S
56	XMC2207-10	I	R	R	S	I	S	I	R	R	S	R
57	XMC2207-1C	S	S	S	S	S	S	S	S	S	S	S
58	XMC2207-3	R	R	R	S	S	S	S	S	I	R	R
59	XMC2207-4	I	R	S	S	S	S	S	S	R	S	S
60	XMC2207-5	R	R	S	S	S	S	S	S	R	S	R
61	XMC2207-7	R	R	R	I	S	S	I	R	R	R	R
62	XMC2207-8	S	S	S	S	S	S	S	S	I	S	S
63	XMC2207-9A	S	S	S	I	S	S	S	R	S	S	S
64	XMC2207-9B	S	S	S	I	S	S	S	R	S	S	S
65	XMC2207-9S	S	R	S	I	S	R	I	I	S	S	S
66	XMCH2207-7	R	R	R	I	S	S	S	R	R	R	R
67	XMCS2207-1	R	S	S	I	I	R	I	S	S	S	I
68	XMCS2207-2	R	R	R	R	S	S	S	R	R	R	R
69	XMCS2207-3A	R	S	S	I	S	S	S	S	S	S	S
70	XMCS2207-3B	R	S	S	I	S	S	R	R	S	S	S
71	XMCS2207-3S	R	R	S	I	S	S	I	S	I	S	S
72	XMCS2207-4	I	S	S	S	S	S	S	S	S	S	S
73	XMCS2207-5	S	S	S	S	S	S	S	S	I	S	S
74	XMCS2207-6	R	R	S	S	S	S	S	S	R	S	R
75	YS2206-1	I	I	S	I	S	I	S	S	S	S	S
76	YS2206-11	S	S	S	I	S	S	S	S	S	S	S
77	YS2206-2	R	R	R	R	R	R	R	R	R	R	R
78	YS2206-3	R	R	R	R	S	S	S	R	R	R	R
79	YS2206-4	R	S	S	R	S	I	S	R	R	S	R
80	YS2206-5	R	I	S	I	R	R	I	R	R	S	S
81	YS2206-6	S	S	S	I	R	R	S	S	R	S	S
82	YS2206-7	S	S	S	I	R	R	S	S	R	S	S
83	YS2206-8	R	I	S	I	S	S	S	S	S	S	S
84	YS2206-9	S	S	S	I	S	S	S	S	S	S	S
85	YS2305-1	S	S	R	S	S	S	S	S	R	S	S
86	YS2305-2	R	I	S	I	R	R	S	R	R	S	S
87	YS2305-3	R	R	R	R	S	R	S	R	R	R	R
88	ZD2206-10	R	S	S	S	S	S	S	S	S	S	S
89	WA01	S	S	S	S	S	S	I	S	I	S	S
90	WA02	R	S	S	S	S	S	S	S	S	S	S
91	WA03	S	S	S	S	S	S	S	S	S	S	S
92	WA04	S	S	S	S	S	S	S	S	S	S	S
93	WA05	S	S	S	S	S	S	S	S	S	S	S
94	WA06	S	S	S	I	S	S	S	S	S	S	S
95	WA07	S	S	S	I	S	S	S	S	S	S	S
96	WA08	S	S	S	I	S	I	S	S	I	S	S
97	WA09	S	S	S	I	S	I	S	S	I	S	S
98	WA10	S	S	S	I	S	S	S	S	S	S	S
99	WA11	S	S	S	I	S	S	S	S	S	S	S
100	WA12	R	R	S	I	I	R	R	I	I	I	S
101	WA13	S	R	I	I	R	S	R	R	S	I	S
102	WA14	R	R	I	R	R	R	R	I	I	S	R
103	WA15	I	S	S	I	R	S	R	S	I	S	S
104	WA16	R	R	R	R	R	R	R	R	S	R	R
105	WA17	S	I	S	I	S	S	R	R	I	S	S
106	WA18	S	I	S	I	S	S	R	R	I	S	S
107	WA19	I	S	S	S	S	S	S	S	I	S	S
108	WA20	I	R	S	R	I	R	R	R	I	I	R
109	WA21	S	S	S	S	I	I	S	S	S	S	R
110	WA22	R	R	R	R	R	R	R	I	R	R	R
111	WA23	R	S	S	I	I	I	S	R	I	S	S
112	WA24	S	R	S	R	R	R	S	S	R	S	I
113	WA25	R	S	R	R	I	R	I	S	R	S	S
114	WA26	R	I	S	R	R	R	R	R	R	R	R
115	WA27	R	I	S	R	I	R	R	I	R	I	R
116	WA28	R	R	I	R	S	S	R	R	S	S	S
117	WA29	R	S	S	R	I	R	R	R	R	S	R
118	WA30	I	S	S	I	R	R	I	S	R	S	S
119	WA31	I	R	S	R	R	R	I	S	R	S	S
120	WA32	R	I	S	R	R	R	I	S	I	S	S
121	WA33	S	S	S	S	S	S	S	S	I	S	S
122	WA34	S	S	S	S	S	S	S	S	I	S	S
123	WA35	S	S	S	S	S	S	S	S	S	S	S
124	WA36	R	R	S	R	R	R	R	S	R	S	R
