# Supplementary material for: Genetic Diversity, Host Adaptation, and Public Health Implications of Escherichia coli in Qinghai Plateau Animals
Source: Research Square preprint supplement (doi:10.21203/rs.3.rs-6997435/v1), 2025-08-12
Supplement: Supplementary file 3 [file b4caa391af91068331186a27.xlsx]

## Sheet: 1
Strain	Strain	MLST	Housekeeping genes
			adk	fumC	gyrB	icd	mdh	purA	recA
1	QML2206-4	ST40	6	4	5	26	20	8	14
2	QML2206-5	ST155	6	4	14	16	24	8	14
3	QML2206-8	ST58	6	4	4	16	24	8	14
4	QML2206-12	ST2522	6	29	5	18	11	8	2
5	HY2206-9x	ST155	6	4	14	16	24	8	14
6	HY2206-11x	ST1252	176	4	12	16	7	7	7
7	XMC2207-7	ST156	6	29	32	16	11	8	44
8	XMC2207-4	ST342	1	46	69	1	20	34	7
9	MQ2206-25	ST56	6	4	4	18	24	5	14
10	MQ2206-33	ST101	43	41	15	18	11	7	6
11	MQ2206-40	ST2522	6	29	5	18	11	8	2
12	MQ2206-38	ST101	43	41	15	18	11	7	6
13	MQ2206-39	ST3884	6	6	5	88	9	8	7
14	MQ2206-41	ST58	6	4	4	16	24	8	14
15	YS2206-11	ST21	16	4	12	16	9	7	7
16	XMCS2207-3A	ST73	36	24	9	13	17	11	25
17	QML2206-7	ST43	24	11	4	8	8	8	2
18	YS2206-7	ST21	16	4	12	16	9	7	7
19	ZD2206-10	ST10	10	11	4	8	8	8	2
20	XMC2207-1	ST56	6	4	4	18	24	5	14
21	XMC2207-3	ST1249	6	23	5	16	24	18	6
22	QML2206-2	ST2166	6	29	5	16	9	8	44
23	XMC2207-10	ST1642	6	4	5	18	11	8	6
24	XMCS2207-1	ST58	6	4	4	16	24	8	14
25	XMCS2207-3B	ST2035	6	8	4	225	9	23	7
26	XMCS2207-4	ST10601	6	6	3	10	7	18	7
27	XMCS2207-5	ST56	6	4	4	18	24	5	14
28	XMCS2207-6	ST2166	6	29	5	16	9	8	44
29	MQ2206-22	ST2522	6	29	5	18	11	8	2
30	MQ2206-23	ST56	6	4	4	18	24	5	14
31	MQ2206-26	ST2522	6	29	5	18	11	8	2
32	MQ2206-30	ST101	43	41	15	18	11	7	6
33	MQ2206-37	ST85	6	6	32	26	11	26	7
34	MQ2206-42	ST345	6	4	14	1	20	62	7
35	MQ2206-35	ST101	43	41	15	18	11	7	6
36	MQ-1	ST16080	6	4	1592	16	24	8	14
37	MQ2206-4	ST56	6	4	4	18	24	5	14
38	MQ2206-6	ST16626	6	6	32	1	11	26	7
39	XMC2207-9A	Untypeable	902	11	4	8	8	8	Absent
40	XMC2207-9B	ST1665	63	29	3	1	24	23	7
41	XMC2207-9S	Untypeable	933	1736	1102	45	11	239	7
42	MQ2206-21	ST1101	9	8	5	1	9	8	7
43	MQ2206-21A	ST1101	9	8	5	1	9	8	7
44	YS2206-1	Untypeable	997	6	4	702	24	5	Absent
45	YS2206-5	ST1079	6	19	14	16	11	12	2
46	YS2206-6	ST58	6	4	4	16	24	8	14
47	YS2206-8	ST6178	9	6	15	56	9	26	6
48	YS2206-9	Untypeable	No matching records	No matching records	5	10	90	8	Absent
49	XMCS2207-2	ST10	10	11	4	8	8	8	2
50	HY2206-10	Untypeable	176	4	12	16	7	7	Absent
51	HY2206-9	ST2522	6	29	5	18	11	8	2
52	HY2206-5	Untypeable	1114	29	5	26	24	8	Absent
53	HY2206-1	ST446	6	19	3	26	11	8	6
54	XMCH2207-7	ST156	6	29	32	16	11	8	44
55	XMCS2207-3S	ST2035	6	8	4	225	9	23	7
56	MQ2206-3	Untypeable	997	95	158	56	11	8	Absent
57	MQ2206-7	ST446	6	19	3	26	11	8	6
58	MQ2206-1	ST2973	6	95	158	56	11	8	41
59	HY2206-8x	ST75	6	6	5	10	20	23	6
60	HY2206-1x	ST3884	6	6	5	88	9	8	7
61	HY2206-10x	ST1252	176	4	12	16	7	7	7
62	HY2206-6x	ST6178	9	6	15	56	9	26	6
63	QML2206-9	ST40	6	4	5	26	20	8	14
64	YS2206-2	ST109	6	6	1	16	9	13	2
65	QML2206-10	Untypeable	997	4	12	1	131	13	Absent
66	MQ-2	ST2522	6	29	5	18	11	8	2
67	MQ2206-27	ST1665	63	29	3	1	24	23	7
68	MQ2206-31	ST58	6	4	4	16	24	8	14
69	QML2206-6	ST40	6	4	5	26	20	8	14
70	XMC2207-8	ST155	6	4	14	16	24	8	14
71	QML2206-13	ST1426	6	4	12	9	9	12	7
72	QML2206-15	ST2179	9	65	5	18	11	8	6
73	YS2206-3	ST10	10	11	4	8	8	8	2
74	YS2206-4	ST156	6	29	32	16	11	8	44
75	XMC2207-1C	ST223	6	4	4	18	24	8	14
76	QML2206-1	ST602	6	19	33	26	11	8	6
77	QML2206-14	ST2253	6	11	4	10	7	7	6
78	WA01	Untypeable	13	39	19	36	30	14	No matching records
79	WA02	Untypeable	9	6	12	18	9	26	No matching records
80	WA03	Untypeable	6	4	12	9	9	12	No matching records
81	WA04	Untypeable	6	4	12	9	9	12	Absent
82	WA05	Untypeable	6	6	14	18	7	7	No matching records
83	WA06	Untypeable	6	19	3	16	11	8	Absent
84	WA07	Untypeable	63	29	3	1	24	23	Absent
85	WA08	Untypeable	6	19	3	16	11	8	Absent
86	WA09	Untypeable	6	4	33	136	99	8	Absent
87	WA10	Untypeable	6	6	5	10	20	23	Absent
88	WA11	Untypeable	6	4	12	9	9	12	Absent
89	WA12	Untypeable	6	4	375	9	9	12	Absent
90	WA13	Untypeable	6	6	5	10	20	23	Absent
91	WA14	Untypeable	9	6	15	56	9	26	Absent
92	WA15	Untypeable	6	19	33	26	11	8	Absent
93	WA16	Untypeable	6	19	33	26	11	8	Absent
94	WA17	Untypeable	9	6	15	56	9	26	Absent
95	WA18	Untypeable	6	19	4	88	43	8	Absent
96	WA19	Untypeable	6	4	14	16	24	8	Absent
97	WA20	Untypeable	6	4	14	16	24	8	Absent
98	WA21	Untypeable	9	6	15	56	9	26	Absent
99	WA22	Untypeable	9	6	15	18	9	26	Absent
100	WA23	Untypeable	6	6	14	18	7	7	No matching records
101	WA24	Untypeable	6	19	4	18	434	8	Absent
102	WA25	Untypeable	6	4	33	136	99	8	Absent
103	WA26	Untypeable	9	6	15	56	9	26	Absent
104	WA27	Untypeable	6	29	32	16	11	8	Absent
105	WA28	Untypeable	6	6	270	702	522	8	Absent
106	WA29	Untypeable	6	6	14	18	7	7	No matching records
107	WA30	Untypeable	6	4	12	9	9	12	Absent
108	WA31	Untypeable	6	4	12	9	9	12	Absent
109	WA32	Untypeable	13	39	19	36	30	14	Absent
110	WA33	Untypeable	6	4	4	16	43	8	Absent
111	WA34	Untypeable	9	6	15	18	9	26	No matching records
112	WA35	Untypeable	6	6	14	8	7	7	No matching records
113	WA36	Untypeable	373	414	264	283	224	16	Absent
115	XMC2207-5	ST2166	6	29	5	16	9	8	44
117	MQ2206-34	Untypeable	502	95	158	56	11	8	Absent
118	YS2305-1	Untypeable	747	6	32	26	11	26	Absent
119	YS2305-2	Untypeable	987	40	47	13	36	1321	Absent
120	YS2305-3	Untypeable	1421	11	4	8	8	8	Absent
121	MQ1-1	Untypeable	1114	4	3	16	11	8	No matching records
122	MQ2-1	Untypeable	1114	6	5	10	9	8	No matching records
123	MQ3-1	Untypeable	1570	6	33	26	11	8	No matching records
124	MQ4-1	Untypeable	1114	11	355	9	11	18	No matching records
125	MQ5-1	Untypeable	997	6	33	26	11	8	No matching records
126	MQ6-1	Untypeable	997	19	33	26	11	8	No matching records
