# Supplementary material for: Genetic Diversity, Host Adaptation, and Public Health Implications of Escherichia coli in Qinghai Plateau Animals
Source: Research Square preprint supplement (doi:10.21203/rs.3.rs-6997435/v1), 2025-08-12
Supplement: Supplementary file 4 [file e33a450da41bf561260f1551.xlsx]

## Sheet: 1
No.	Strain	Virluence genes
1	QML2206-1	F17	ompA	fimC	fimA	luxs	hlyA	etrA	aer
2	QML2206-2	F17	flu	ompA	fimC	fimA	luxs	PAPC	etrA
3	QML2206-4	flu	ompT	ompA	fimC	luxs	hlyF	etrA
4	QML2206-5	eaeA	F17	espA	flu	ompA	fimC	luxs	hlyA	etrA	HPI
5	QML2206-6	eaeA	espA	ompA	fimC	luxs	hlyA
6	QML2206-7	F17	ompA	fimC	fimA	hlyA	etrA	aer	HPI
7	QML2206-8	F17	flu	ompA	fimC	fimA	luxs	hlyA
8	QML2206-9	F17	flu	ompA	fimC	fimA	luxs	hlyA	etrA
9	QML2206-10	F17	ompA	fimC	fimA	luxs	etrA
10	QML2206-12	F17	flu	ompA	fimC	fimA	luxs	etrA
11	QML2206-13	ompA	fimC	fimA	luxs	PAPC	etrA
12	QML2206-14	flu	ompT	ompA	fimC	luxs	hlyA	hlyF	etrA	aer	HPI
13	QML2206-15	ompT	ompA	fimC	fimA	luxs	hlyA	hlyF	etrA	HPI
14	YS2206-1	ompA	fimC	fimA	luxs	hlyA	hlyF	etrA
15	YS2206-2	sfaD	flu	ompA	fimC	fimA	luxs	aer	HPI
16	YS2206-3	flu	ompT	ompA	fimC	fimA	luxs	hlyF	etrA	aer
17	YS2206-4	F17	flu	ompA	fimC	fimA	luxs
18	YS2206-5	flu	ompA	fimC	fimA	luxs	etrA
19	YS2206-6	F17	ompA	fimC	fimA	luxs	aer	HPI
20	YS2206-7	eaeA	espA	flu	ompA	fimC	fimA	luxs	hlyA	etrA	aer	HPI
21	YS2206-9	ompA	fimC	fimA	luxs	hlyA	etrA
22	YS2206-11	F17	flu	ompT	ompA	fimC	luxs	hlyA	hlyF	PAPC	etrA	aer
23	ZD2206-10	F17	flu	ompA	fimC	fimA	luxs	etrA
24	YS2206-8	flu	ompA	fimC	fimA	luxs	etrA
25	MQ2206-1	flu	ompT	ompA	fimC	fimA	luxs	hlyF
26	MQ2206-3	ompT	ompA	fimC	luxs	hlyF	etrA
27	MQ2206-4	F17	flu	ompT	ompA	fimC	fimA	luxs	hlyF	etrA	HPI
28	MQ2206-6	F17	ompT	ompA	fimC	fimA	luxs	hlyA	hlyF	etrA
29	MQ2206-7	flu	ompA	fimC	fimA	luxs	etrA
30	XMCS2207-1	F17	ompT	ompA	fimC	fimA	luxs	hlyF	etrA	aer	HPI
31	XMCS2207-2	ompA	fimC	fimA	luxs	etrA	aer
32	XMCS2207-3S	F17	flu	ompA	fimC	fimA	luxs	etrA
33	XMCS2207-4	F17	ompA	fimC	luxs	etrA	aer
34	XMCS2207-5	F17	flu	ompA	fimC	fimA	luxs	hlyA	etrA
35	XMCS2207-6	F17	ompA	fimC	fimA	luxs	etrA
36	XMCH2207-7	F17	flu	ompA	fimC	fimA	luxs	hlyA	aer
37	XMC2207-1	F17	flu	ompT	ompA	fimC	fimA	luxs	hlyF	etrA	aer
38	XMC2207-1C	F17	flu	ompA	fimC	fimA	luxs	etrA	aer
39	XMC2207-3	F17	flu	ompA	fimC	luxs	etrA
40	XMC2207-4	eaeA	espA	ompA	fimC	fimA	luxs	hlyA	etrA	LEE
41	XMC2207-5	F17	flu	ompA	fimC	fimA	luxs	etrA
42	XMC2207-7	F17	flu	ompA	fimC	fimA	luxs	etrA
43	XMC2207-8	F17	flu	ompA	fimC	fimA	luxs	etrA	aer
44	XMC2207-9A	ompA	fimC	IuxS	etrA	hlyE
45	XMC2207-10	F17	flu	ompA	fimC	luxs	etrA	aer
46	MQ2206-21	flu	ompA	fimC	fimA	luxs	hlyA
47	MQ2206-21A	ompA	fimC	fimA	luxs	PAPC
48	MQ2206-22	F17	flu	ompA	fimC	fimA	luxs	etrA
49	MQ2206-23	F17	flu	ompA	fimC	fimA	luxs
50	MQ2206-25	F17	flu	ompA	fimC	fimA	luxs	etrA	aer
51	MQ2206-26	F17	flu	ompA	fimC	fimA	luxs	PAPC	etrA	HPI
52	MQ2206-27	flu	ompA	fimC	fimA	luxs	hlyA	PAPC
53	MQ2206-30	F17	flu	ompA	fimC	fimA	luxs
54	MQ2206-31	flu	ompA	fimC	luxs	etrA	HPI
55	MQ2206-33	F17	flu	ompA	fimC	fimA	luxs	aer	HPI
56	MQ2206-34	sfaD	flu	ompA	fimC	luxs	hlyA	etrA
57	MQ2206-35	F17	flu	ompA	fimC	fimA	luxs	etrA	aer
58	MQ2206-37	F17	ompA	fimC	fimA	luxs	etrA	HPI
59	MQ2206-38	F17	flu	ompA	fimC	fimA	luxs	hlyA	etrA
60	MQ2206-39	F17	flu	ompA	fimC	fimA	luxs	hlyA	etrA
61	MQ2206-40	F17	ompA	fimC	fimA	luxs	etrA
62	MQ2206-41	F17	flu	ompA	fimC	fimA	luxs	hlyA	etrA
63	MQ2206-42	F17	flu	ompA	fimC	fimA	luxs	hlyA	etrA
64	MQ-1	F17	flu	ompT	ompA	fimC	luxs	hlyA	hlyF	PAPC	etrA
65	MQ-2	F17	ompA	fimC	fimA	luxs	etrA	aer
66	XMCS2207-3A	F17	flu	ompA	fimC	fimA	luxs
67	XMCS2207-3B	F17	flu	ompA	fimC	fimA	luxs	hlyA	etrA
68	XMC2207-9S	flu	ompA	fimC	luxs	etrA
69	XMC2207-9B	ompA	fimC	luxs	etrA
70	HY2206-1	ompA	fimC	luxs
71	HY2206-5	flu	ompA	fimC	fimA	luxs
72	HY2206-9	F17	flu	ompA	fimC	fimA	hlyA	etrA	aer
73	HY2206-10	flu	ompA	fimC	fimA	luxs	luxs	hlyA	etrA
74	HY2206-1x	F17	flu	ompA	fimC	luxs	aer
75	HY2206-6x	ompA	fimC	luxs			etrA
76	HY2206-8x	F17	flu	ompA	fimC	fimA
77	HY2206-9x	F17	flu	ompA	fimC	luxs	luxs
78	HY2206-10x	F17	flu	ompA	fimC	fimA
79	HY2206-11x	flu	ompA	fimC	fimA	luxs	luxs	hlyA	aer	HPI
80	YS2305-1	sfaD	F17	aer	ompT	flu	hlyA	VT1	SLT2
81	YS2305-2	sfaD	F17	aer	ompT	flu	ompA	fimC	luxs	etrA	PAPC	hlyA	HPI
82	YS2305-3	sfaD	F17	aer	ompT	flu	ompA	fimC	luxs	etrA	PAPC	hlyA
83	MQ1-1	F17	flu	ompA	fimC	luxs	ompA	fimC	luxs	etrA	PAPC	hlyA	HPI
84	MQ2-1	F17	flu	ompA	fimC	luxs	etrA	hlyA
85	MQ3-1	F17	flu	ompA	fimC	luxs	etrA	PAPC	hlyA
86	MQ4-1	F17	flu	ompA	fimC	luxs	etrA
87	MQ5-1	F17	flu	ompA	fimC	luxs	etrA	hlyA
88	MQ6-1	F17	flu	ompA	fimC	etrA	etrA	hlyA
89	WA01	hlyF	flu	ompA	fimC	etrA	F17	sepA
90	WA02	ompA	fimC	IuxS	papC	HPI	papC	fimA
91	WA03	flu	ompA	fimC	IuxS	etrA	F17	ompT	hlyE
92	WA04	flu	ompA	fimC	IuxS	etrA	PAPC	hlyA
93	WA05	flu	ompA	fimC	IuxS	etrA	papC
94	WA06	fimA	flu	ompA	fimC	IuxS
95	WA07	fimA	flu	ompA	fimC	etrA	etrA
96	WA08	fimA	flu	ompA	fimC	IuxS	etrA	hlyE
97	WA09	F17	aer	ompT	hlyF	flu
98	WA10	ompA	fimC	IuxS	etrA		ompA	fimC	IuxS	etrA	papC	VT1
99	WA11	flu	ompA	fimC	IuxS	etrA
100	WA12	flu	ompA	fimC	IuxS	etrA
101	WA13	aer	ompT	hlyF	flu	ompA	ST2
102	WA14	flu	ompA	fimC	IuxS	etrA	hlyE
103	WA15	flu	ompA	fimC	IuxS	etrA	papC
104	WA16	ompA	fimC	IuxS	etrA	papC
105	WA17	F17	ompT	hlyF	flu	ompA	papC	hlyE
106	WA18	F17	flu	ompA	fimC	IuxS	fimC	IuxS	etrA	hlyE	987P
107	WA19	F17	aer	fimA	ompT	hlyF	fimC	IuxS	etrA	papC	hlyE
108	WA20	F17	aer	ompT	hlyF	ompA	flu	ompA	fimC	IuxS	etrA	papC	hlyE
109	WA21	sfaD	ompA	fimC	IuxS	etrA	fimC	IuxS	etrA	HPI
110	WA22	aer	ompT	hlyF	flu	ompA	fimC	IuxS	etrA	hlyE
111	WA23	F17	ompA	fimC	IuxS	etrA	HPI	hlyE	987P
112	WA24	fimA	flu	ompA	fimC	IuxS	HPI	hlyE
113	WA25	flu	ompA	fimC	IuxS	etrA	fimC	IuxS	etrA	HPI	hlyE	987P
114	WA26	F17	ompT	hlyF	flu	ompA	etrA	HPI	hlyE
115	WA27	F17	fimA	ompA	fimC	IuxS	HPI	sepA	F41
116	WA28	ompA	fimC	luxs	etrA
117	WA29	F17	aer	ompT	hlyF	flu	etrA	HPI
118	WA30	F17	ompT	hlyF	ompA	fimC	ompA	fimC	IuxS	etrA	VT1
119	WA31	F17	fimA	ompA	fimC	IuxS	HPI	sepA	F41
120	WA32	F17	ompA	fimC	IuxS	etrA	HPI	hlyE
121	WA33	fimA	flu	ompA	fimC	IuxS	IuxS	etrA	HPI	hlyE
122	WA34	IuxS	etrA	HPI	hlyE
123	WA35	F17	ompT	hlyF	ompA	fimC
124	WA36	ompA	fimC	IuxS
