# Supplementary material for: Genetic Diversity, Host Adaptation, and Public Health Implications of Escherichia coli in Qinghai Plateau Animals
Source: Research Square preprint supplement (doi:10.21203/rs.3.rs-6997435/v1), 2025-08-12
Supplement: Supplementary file 5 [file fdd410bb7f8b352b766ebac1.xlsx]

## Sheet: 1
No.	Strain	Antibiotics resistance genes
1	HY2206-1	blaTEM	cat2
2	HY2206-10	blaTEM	cat2	cat1
3	HY2206-10x	cat2	cat1
4	HY2206-11x	blaTEM	cat2	cat1
5	HY2206-1x	tetB	blaTEM	cat1
6	HY2206-5	tetB	blaTEM	cat2	cat1
7	HY2206-6x	blaTEM	cat1
8	HY2206-8x	blaTEM	cat1
9	HY2206-9	blaTEM	cat2	cat1
10	HY2206-9x	blaTEM	cat2	cat1
11	MQ-1	blaTEM	cat2	cat1
12	MQ1-1	tetB	tetC	SUL1	SUL2	SUL3	blaSHV	cat1	aadA2	aac(6')-Ib	CTX-M9
13	MQ-2	SUL2	blaTEM	cat2	cat1
14	MQ2-1	tetB	tetC	SUL1	SUL2	SUL3	blaSHV	cat1	aadA2	aac(6')-Ib	CTX-M8
15	MQ2206-1	tetA	SUL1	cat2	cat1
16	MQ2206-21	blaTEM	cat2	cat1
17	MQ2206-21A	tetB	tetB	blaTEM	cat2	cat1
18	MQ2206-22	SUL2	blaTEM	cat2	cat1
19	MQ2206-23	cat2	cat1
20	MQ2206-25	SUL2	blaTEM	cat2	cat1	aadA2
21	MQ2206-26	tetA	tetD	SUL2	SUL3	blaTEM	cat2	cat1	aadA2	aph(s')-vII
22	MQ2206-27	blaTEM	cat2	cat1
23	MQ2206-3	tetA	tetB	SUL1	blaTEM	cat2	cat1
24	MQ2206-30	blaTEM	cat2	cat1
25	MQ2206-31	blaTEM	cat2	cat1
26	MQ2206-33	SUL2	blaTEM	cat2	cat1
27	MQ2206-34	tetD	cat2	cat1
28	MQ2206-35	tetB	blaTEM	cat2	cat1
29	MQ2206-37	blaTEM	cat2	cat1
30	MQ2206-38	cat2	cat1
31	MQ2206-39	tetB	blaTEM	cat1
32	MQ2206-4	SUL2	blaTEM	cat2
33	MQ2206-40	blaTEM	cat1
34	MQ2206-41	tetB	SUL2	blaTEM	cat1
35	MQ2206-42	blaTEM	cat2	cat1
36	MQ2206-6	tetA	SUL1	SUL2	blaTEM	cat2	cat1
37	MQ2206-7	blaTEM	cat2	cat1
38	MQ3-1	tetA	tetB	tetC	SUL1	SUL2	SUL3	blaTEM	blaSHV	cat1	aadA2	aac(6')-Ib	CTX-M8	CTX-M9
39	MQ4-1	tetB	tetC	SUL1	SUL2	SUL3	blaTEM	blaSHV	cat1	aadA2	aac(6')-Ib	CTX-M9
40	MQ5-1	tetB	tetC	SUL1	SUL2	SUL3	blaTEM	blaSHV	cat1	aadA2	aac(6')-Ib	CTX-M9
41	MQ6-1	tetB	tetC	SUL1	SUL2	SUL3	blaTEM	blaSHV	cat1	aadA2	aac(6')-Ib	CTX-M8	CTX-M9
42	QML2206-1	tetB	blaTEM	cat1
43	QML2206-10	blaTEM	cat2	cat1
44	QML2206-12	blaTEM	cat2	cat1
45	QML2206-13	blaTEM	cat1
46	QML2206-14	tetA	tetD	SUL1	SUL2	blaTEM	cat2	cat1
47	QML2206-15	tetA	SUL1	SUL2	blaTEM	cat2	cat1	aac(6')-Ib
48	QML2206-2	tetB	blaTEM	cat2	cat1	aac(6')-Ib
49	QML2206-4	tetA	SUL1	SUL2	blaTEM	cat2	cat1
50	QML2206-5	tetB	blaTEM	cat2	cat1
51	QML2206-6	blaTEM	cat2	cat1
52	QML2206-7	tetB	cat2	cat1	CTX-M9
53	QML2206-8	SUL1	SUL2	blaTEM	cat2	cat1
54	QML2206-9	SUL2	blaTEM	cat2	cat1
55	WA01	blaTEM	tetB
56	WA02	blaTEM
57	WA03	blaTEM
58	WA04	blaTEM
59	WA05	blaTEM
60	WA06	blaTEM	CTX-M8
61	WA07	blaTEM	tetB	CTX-M8
62	WA08	blaTEM	tetB	CTX-M8	sul2
63	WA09	blaTEM	tetB	CTX-M8
64	WA10	blaTEM	tetB
65	WA11	blaTEM	tetB	qnrS
66	WA12	tetA	blaTEM	qnrS
67	WA13	blaTEM	tetB
68	WA14	blaTEM	CTX-M8
69	WA15	blaTEM	CTX-M8
70	WA16	tetA	blaTEM	sul1	qnrS	CTX-M9
71	WA17	tetA	tetB	blaTEM	qnrS
72	WA18	blaTEM	tetB	CTX-M8	sul1
73	WA19	tetA	blaTEM	sul1	qnrS	CTX-M9
74	WA20	blaTEM	tetM
75	WA21	blaTEM
76	WA22	blaTEM	CTX-M8
77	WA23	tetA	tetB	blaTEM	qnrS		aph(3')-vII
78	WA24	blaTEM	cat1
79	WA25	blaTEM	tetM
80	WA26	blaTEM	CTX-M9
81	WA27	blaTEM	CTX-M9
82	WA28	blaTEM	cat1
83	WA29	blaTEM	CTX-M8
84	WA30	tetA	tetB	qnrS	CTX-M9
85	WA31	blaTEM	tetB
86	WA32	blaTEM
87	WA33	blaTEM
88	WA34	tetA	blaTEM	qnrS
89	WA35	tetA	blaTEM	sul1	qnrS	CTX-M9	aph(3')-vII
90	WA36	blaTEM
91	XMC2207-1	tetA	tetB	blaTEM	cat2	cat1
92	XMC2207-10	SUL2	blaTEM	cat2	cat1
93	XMC2207-1C	blaTEM	cat2	cat1
94	XMC2207-3	tetA	tetD	SUL2	cat2	cat1
95	XMC2207-4	cat1
96	XMC2207-5	tetA	SUL1	SUL2	blaTEM	cat2	cat1
97	XMC2207-7	SUL1	blaTEM	cat2	cat1
98	XMC2207-8	blaTEM	cat2	cat1
99	XMC2207-9A	cat2	cat1
100	XMC2207-9B	blaTEM	cat2	cat1
101	XMC2207-9S	tetB	blaTEM	cat2	cat1
102	XMCH2207-7	SUL1	blaTEM	cat2	cat1
103	XMCS2207-1	tetA	tetD	SUL2	blaTEM	cat2
104	XMCS2207-2	tetA	tetD	tetM	SUL2	blaTEM	cat1	aadA2	aph(s')-vII
105	XMCS2207-3A	tetB	SUL2	blaTEM	cat1	aph(s')-vII
106	XMCS2207-3B	SUL2	blaTEM	cat2	cat1
107	XMCS2207-3S	SUL2	blaTEM	cat2	cat1
108	XMCS2207-4	blaTEM	cat2	cat1
109	XMCS2207-5	blaTEM	cat2	cat1
110	XMCS2207-6	tetA	tetB	SUL1	SUL2	SUL3	blaTEM	cat1
111	YS2206-1	blaTEM	cat2	cat1
112	YS2206-11	cat2	cat1	aadA2
113	YS2206-2	tetA	SUL1	SUL2	blaTEM	cat2	cat1
114	YS2206-3	tetA	SUL2	SUL3	blaTEM	cat2	cat1
115	YS2206-4	SUL1	blaTEM	cat2	cat1	aac(6')-Ib
116	YS2206-5	blaTEM	cat2	cat1
117	YS2206-6	blaTEM	cat2	cat1
118	YS2206-7	blaTEM	cat2	cat1
119	YS2206-8	cat2	cat1
120	YS2206-9	blaTEM	cat2	cat1
121	YS2305-1	tetA	tetB	SUL1	SUL2	SUL3	blaTEM	blaSHV	aadA2	aac(6')-Ib	CTX-M1	CTX-M8	CTX-M9
122	YS2305-2	tetA	tetB	SUL1	SUL2	SUL3	blaTEM	blaSHV	aadA2	aac(6')-Ib	CTX-M1	CTX-M9
123	YS2305-3	tetA	tetB	SUL1	SUL2	SUL3	blaSHV	aadA2	aac(6')-Ib	aph(s')-vII	CTX-M1
124	ZD2206-10	SUL2	blaTEM	cat2	cat1
